# Supplementary material for: Retrieval of stratospheric aerosol extinction coefficients from sun-normalized Ozone Mapper and Profiler Suite Limb Profiler (OMPS-LP) measurements
Source: Copernicus journal article supplement (doi:10.5194/amt-17-6677-2024), 2024-11-25
Supplement: Supplementary file 1 [file amt-17-6677-2024-supplement.pdf]

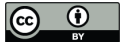

*Supplement of*

## **Retrieval of stratospheric aerosol extinction coefficients from sun-normalized Ozone Mapper and Profiler Suite Limb Profiler (OMPS-LP) measurements**

**Alexei Rozanov et al.**

*Correspondence to:* Alexei Rozanov ([alex@iup.physik.uni-bremen.de](mailto:alex@iup.physik.uni-bremen.de))

The copyright of individual parts of the supplement might differ from the article licence.

Table S1: Retrieved values of the effective surface albedo for the examples shown in Fig. 3 in the manuscript main text and Fig. S4 below.

|      | V2.1, Normalization to the reference tangent height |                 |                  | V2.1, Normalization to the solar irradiance |                 |                  | V1.0.9 (same Level 1 data as in V2.1) |                 |                  |
|------|-----------------------------------------------------|-----------------|------------------|---------------------------------------------|-----------------|------------------|---------------------------------------|-----------------|------------------|
|      | standard a priori                                   | halved a priori | doubled a priori | standard a priori                           | halved a priori | doubled a priori | standard a priori                     | halved a priori | doubled a priori |
| 51°S | 0.50                                                | 0.51            | 0.50             | 0.35                                        | 0.36            | 0.35             | 0.22                                  | 0.27            | 0.15             |
| 21°N | 0.50                                                | 0.51            | 0.50             | 0.31                                        | 0.31            | 0.31             | 0.00                                  | 0.12            | 0.00             |
| 70°N | 0.50                                                | 0.50            | 0.50             | 0.43                                        | 0.44            | 0.42             | 0.00                                  | 0.13            | 0.00             |

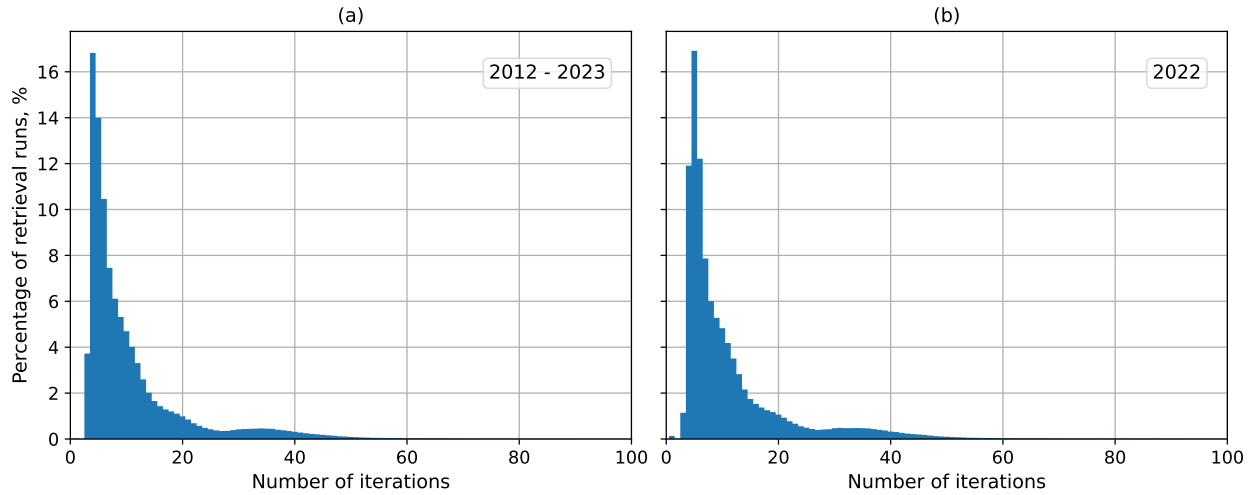

Figure S1: Histogram of the number of iterations needed for a convergence of the retrieval. Y-axis shows a percentage amount of runs converging within a certain number of iterations. Panel (a): all data from 2012 to 2023. Panel (b): the year after the Hunga–Tonga eruption (2022).

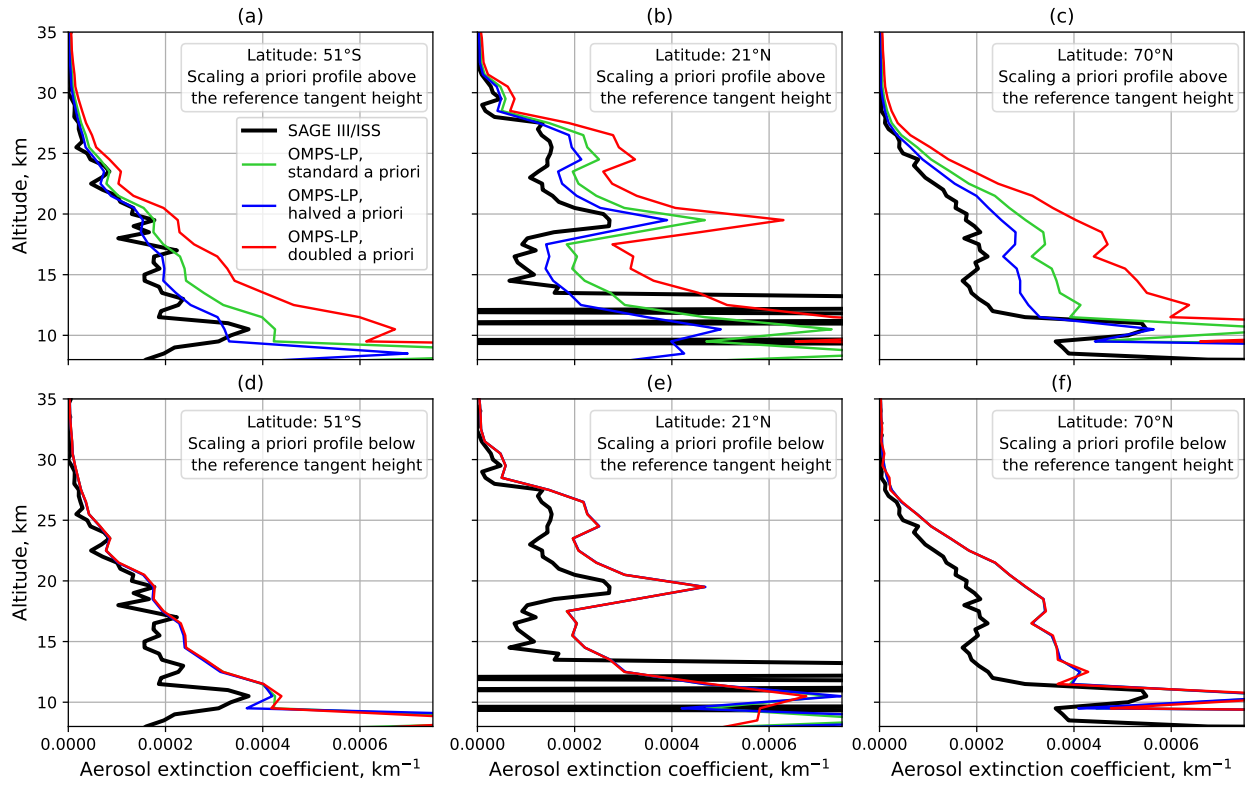

Figure S2: Dependence of the retrieval results on the a priori aerosol extinction profile for the University of Bremen retrieval using the normalization to the limb measurement at the reference tangent height. Panels (a) – (c): scaling a priori profiles at and above the reference tangent height (36 – 50 km). Panels (d) – (f): scaling a priori profiles below the reference tangent height (0 – 36). The comparisons are done for three example OMPS-LP measurements. Panels (a) and (d): January 6, 2018, 15:04:37 UTC; 51°S, 14°W. Panels (b) and (e): January 22, 2018, 10:20:45 UTC; 22°N, 43°E. Panels (c) and (f): July 25, 2018, 04:39:29 UTC; 70°N, 107°E.

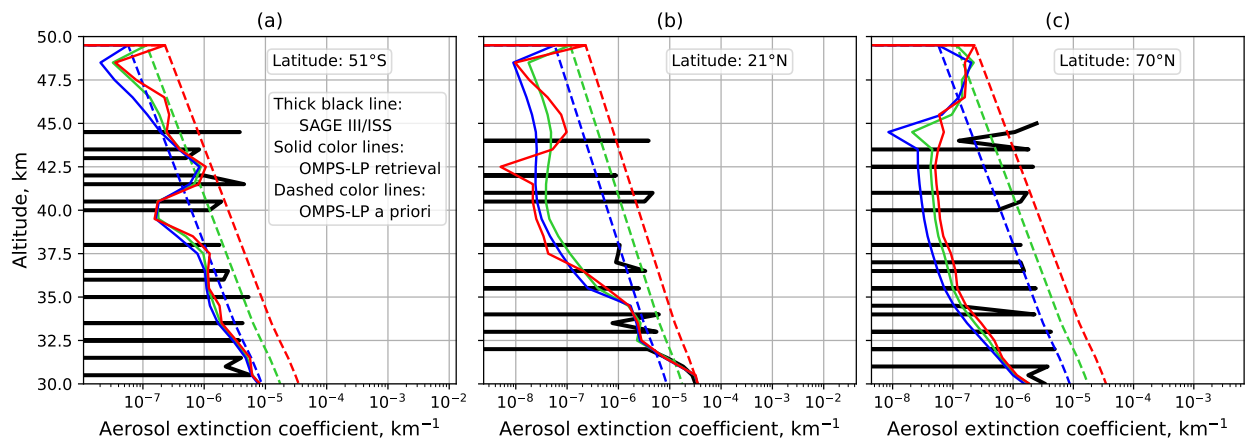

Figure S3: Dependence of the retrieval results on the a priori aerosol extinction profile for the University of Bremen retrieval using the normalization to the solar irradiance. Panel (a): January 6, 2018, 15:04:37 UTC; 51°S, 14°W. Panel (b): January 22, 2018, 10:20:45 UTC; 22°N, 43°E. Panel (c): July 25, 2018, 04:39:29 UTC; 70°N, 107°E.

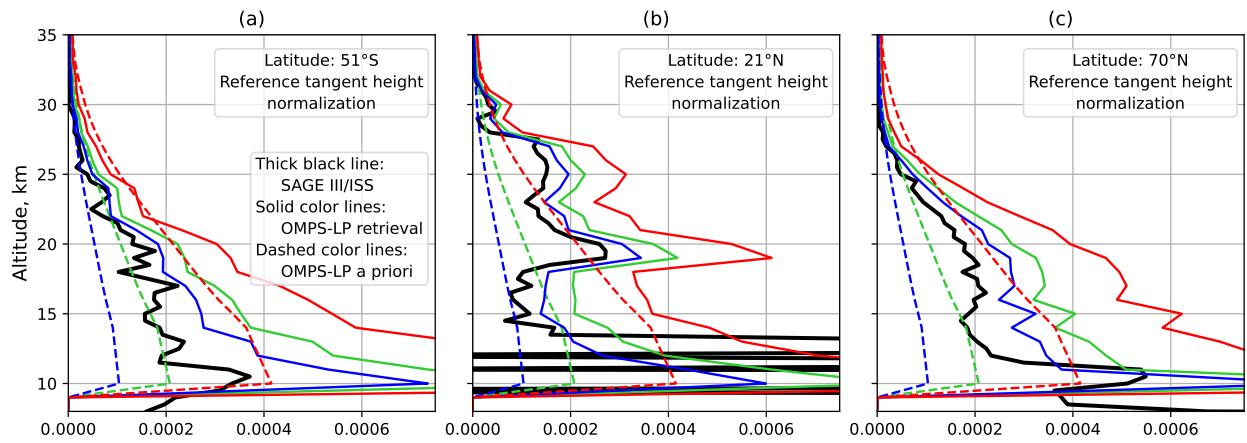

Figure S4: Dependence of the retrieval results on the a priori aerosol extinction profile for the University of Bremen retrieval V1.0.9 (but using the same Level 1 data as V2.1). Panel (a): January 6, 2018, 15:04:37 UTC; 51°S, 14°W. Panel (b): January 22, 2018, 10:20:45 UTC; 22°N, 43°E. Panel (c): July 25, 2018, 04:39:29 UTC; 70°N, 107°E.
